# Supplementary material for: New phenanthrenequinones from Cymbidium ensifolium roots and their anti-inflammatory activity on lipopolysaccharide-activated BV2 microglial cells
Source: Royal Society of Chemistry journal article supplement (doi:10.1039/d4ra04761c), 2024-01-01
Supplement: d4ra04761c1.pdf [file d4ra04761c1.pdf]

## Supporting Information

### **New Phenanthrenequinones from *Cymbidium ensifolium* Roots and Their Anti-inflammatory Activity on Lipopolysaccharide-Activated BV2 Microglial Cells**

May Thazin Thant <sup>a</sup>, Hasriadi Hasriadi <sup>b</sup>, Preeyaporn Poldorn <sup>c</sup>, Siriporn Jungsuttiwong <sup>d</sup>, Pornchai Rojsitthisak <sup>e,f</sup>, Chotima Böttcher <sup>g</sup>, Pasarapa Towiwat <sup>b,h</sup> and Boonchoo Sritularak <sup>a,e,\*</sup>

<sup>a</sup> *Department of Pharmacognosy and Pharmaceutical Botany, Faculty of Pharmaceutical Sciences, Chulalongkorn University, Bangkok 10330, Thailand*

<sup>b</sup> *Department of Pharmacology and Physiology, Faculty of Pharmaceutical Sciences, Chulalongkorn University, Bangkok 10330, Thailand*

<sup>c</sup> *Hong Kong Quantum AI Laboratory, Ltd., Hong Kong, 999077, China*

<sup>d</sup> *Department of Chemistry and Center of Excellence for Innovation in Chemistry, Faculty of Science, Ubon Ratchathani University, Ubon Ratchathani 34190, Thailand*

<sup>e</sup> *Center of Excellence in Natural Products for Ageing and Chronic Diseases, Faculty of Pharmaceutical Sciences, Chulalongkorn University, Bangkok, Thailand*

<sup>f</sup> *Department of Food and Pharmaceutical Chemistry, Faculty of Pharmaceutical Sciences, Chulalongkorn University, Bangkok 10330, Thailand*

<sup>g</sup> *Experimental and Clinical Research Center, a cooperation between the Max Delbrück Center for Molecular Medicine in the Helmholtz Association and Charité – Universitätsmedizin Berlin, Berlin 13125, Germany*

<sup>h</sup> *Animal Models of Chronic Inflammation-associated Diseases for Drug Discovery Research Unit, Chulalongkorn University, Bangkok, 10330, Thailand*

\*Corresponding author

Dr. Boonchoo Sritularak

Department of Pharmacognosy and Pharmaceutical Botany, Faculty of Pharmaceutical Sciences, Chulalongkorn University, Bangkok 10330, Thailand

Phone: +6622188356, Fax: +6622188356, [Boonchoo.sr@chula.ac.th](mailto:Boonchoo.sr@chula.ac.th)

## TABLE OF CONTENTS

|                                                                                                                 |    |
|-----------------------------------------------------------------------------------------------------------------|----|
| <b>Figure S1.</b> HR-ESI-MS spectrum of compound <b>1</b> .....                                                 | 4  |
| <b>Figure S2.</b> UV spectrum of compound <b>1</b> .....                                                        | 4  |
| <b>Figure S3.</b> FT-IR spectrum of compound <b>1</b> .....                                                     | 5  |
| <b>Figure S4.</b> $^1\text{H}$ NMR (acetone- $d_6$ , 400 MHz) spectrum of compound <b>1</b> .....               | 5  |
| <b>Figure S5.</b> $^{13}\text{C}$ NMR and DEPT (acetone- $d_6$ , 100 MHz) spectra of compound <b>1</b> .....    | 6  |
| <b>Figure S6.</b> HSQC (acetone- $d_6$ , 400/100 MHz) spectrum of compound <b>1</b> .....                       | 6  |
| <b>Figure S7.</b> HMBC (acetone- $d_6$ , 400/100 MHz) spectrum of compound <b>1</b> .....                       | 7  |
| <b>Figure S8.</b> NOESY (acetone- $d_6$ , 400 MHz) spectrum of compound <b>1</b> .....                          | 7  |
| <b>Figure S9.</b> HR-ESI-MS spectrum of compound <b>2</b> .....                                                 | 8  |
| <b>Figure S10.</b> UV spectrum of compound <b>2</b> .....                                                       | 8  |
| <b>Figure S11.</b> FT-IR spectrum of compound <b>2</b> .....                                                    | 9  |
| <b>Figure S12.</b> CD spectrum of compound <b>2</b> .....                                                       | 9  |
| <b>Figure S13.</b> $^1\text{H}$ NMR ( $\text{CDCl}_3$ , 400 MHz) spectrum of compound <b>2</b> .....            | 10 |
| <b>Figure S14.</b> $^{13}\text{C}$ NMR and DEPT ( $\text{CDCl}_3$ , 100 MHz) spectra of compound <b>2</b> ..... | 10 |
| <b>Figure S15.</b> HSQC ( $\text{CDCl}_3$ , 400/100 MHz) spectrum of compound <b>2</b> .....                    | 11 |
| <b>Figure S16.</b> HMBC ( $\text{CDCl}_3$ , 400/100 MHz) spectrum of compound <b>2</b> .....                    | 11 |
| <b>Figure S17.</b> HMBC ( $\text{CDCl}_3$ , 400/100 MHz) spectrum (expansion) of compound <b>2</b> .....        | 12 |
| <b>Figure S18.</b> NOESY ( $\text{CDCl}_3$ , 400 MHz) spectrum of compound <b>2</b> .....                       | 12 |
| <b>Figure S19.</b> COSY ( $\text{CDCl}_3$ , 400 MHz) spectrum of compound <b>2</b> .....                        | 13 |
| <b>Figure S20.</b> HR-ESI-MS spectrum of compound <b>3</b> .....                                                | 13 |
| <b>Figure S21.</b> UV spectrum of compound <b>3</b> .....                                                       | 14 |
| <b>Figure S22.</b> FT-IR spectrum of compound <b>3</b> .....                                                    | 14 |
| <b>Figure S23.</b> $^1\text{H}$ NMR (acetone- $d_6$ , 400 MHz) spectrum of compound <b>3</b> .....              | 15 |
| <b>Figure S24.</b> $^{13}\text{C}$ NMR and DEPT (acetone- $d_6$ , 100 MHz) spectra of compound <b>3</b> .....   | 15 |
| <b>Figure S25.</b> HSQC (acetone- $d_6$ , 400/100 MHz) spectrum of compound <b>3</b> .....                      | 16 |
| <b>Figure S26.</b> HMBC (acetone- $d_6$ , 400/100 MHz) spectrum of compound <b>3</b> .....                      | 16 |
| <b>Figure S27.</b> HMBC (acetone- $d_6$ , 400/100 MHz) spectrum (expansion) of compound <b>3</b> .....          | 17 |
| <b>Figure S28.</b> NOESY (acetone- $d_6$ , 400 MHz) spectrum of compound <b>3</b> .....                         | 17 |

**Figure S29.** The whole western blots of N1 (P-NFκB, NFκB and β-actin). .....18  
**Figure S30.** The whole western blots of N2 (P-NFκB, NFκB and β-actin) .....19  
**Figure S31.** The whole western blots of N3 (P-NFκB, NFκB and β-actin) .....20

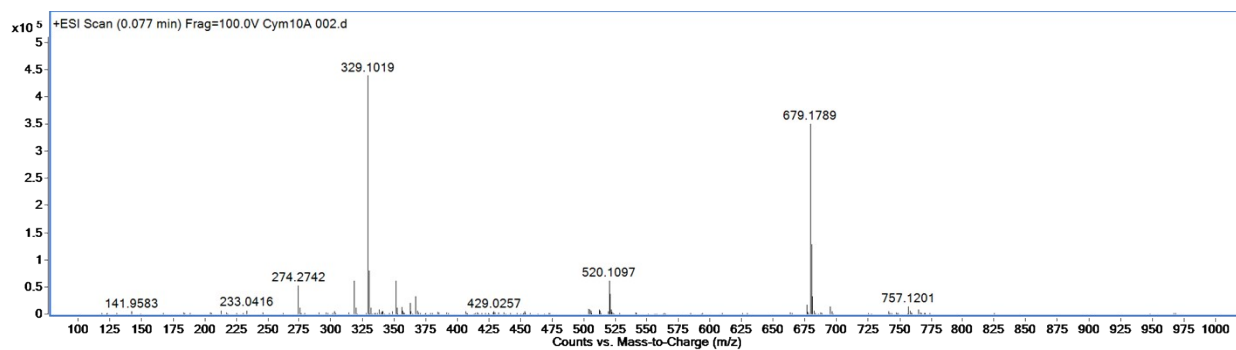

**Figure S1.** HR-ESI-MS spectrum of compound **1**

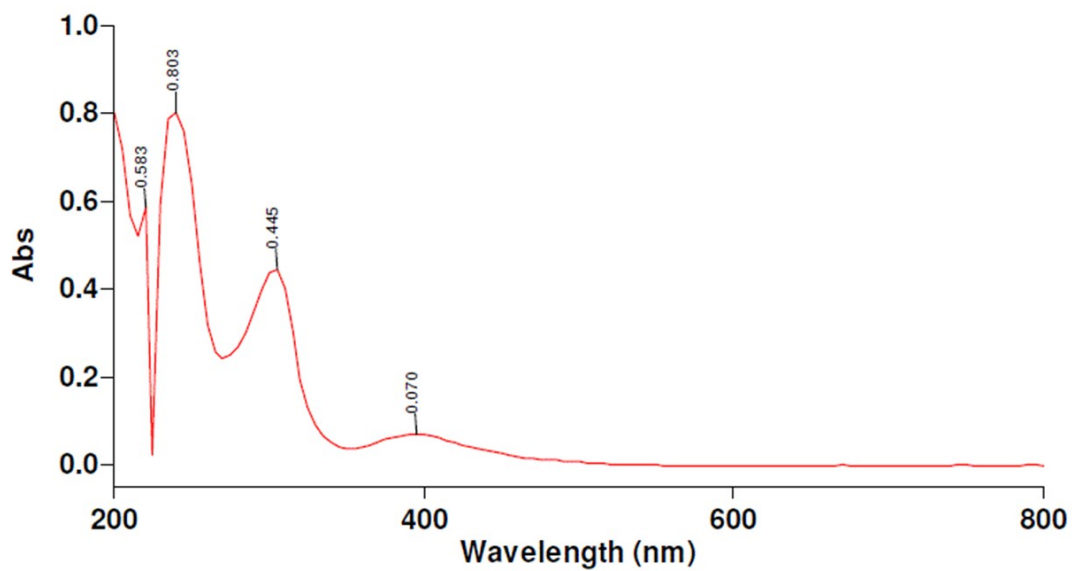

**Figure S2.** UV spectrum of compound **1** (0.0625 mg in 3ml of MeOH)

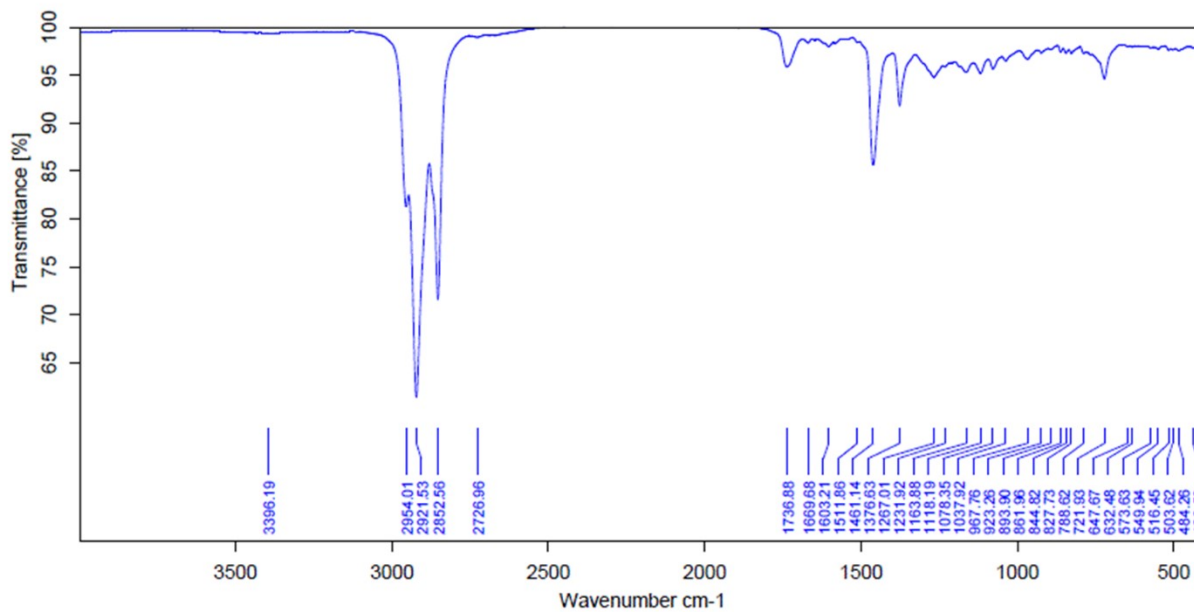

Figure S3. FT-IR spectrum of compound 1

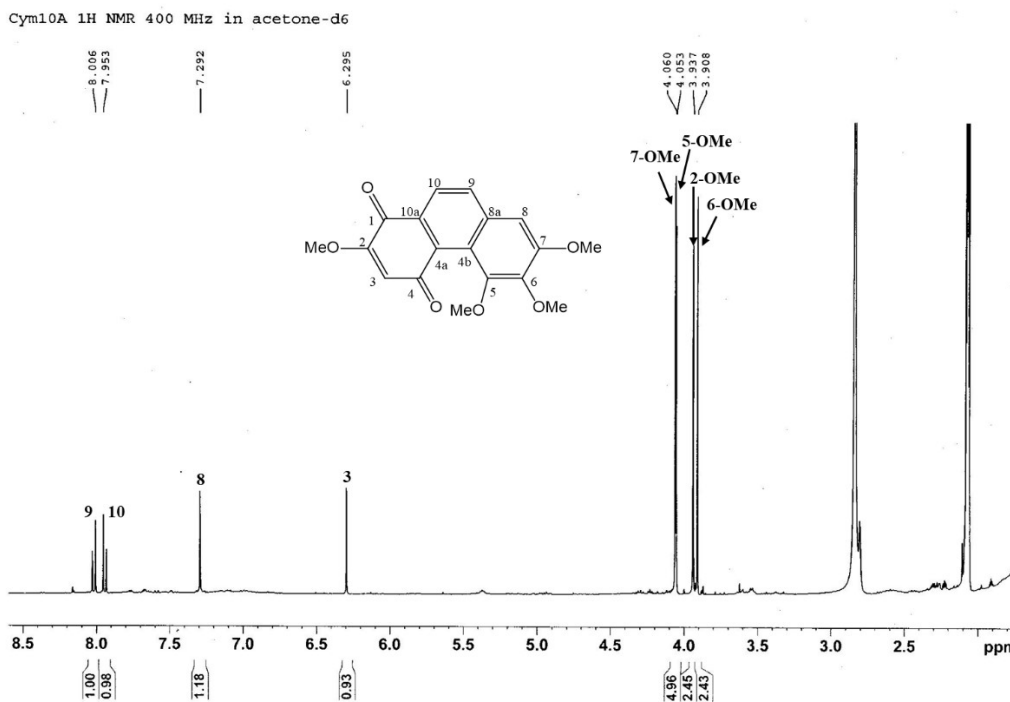

Figure S4. <sup>1</sup>H NMR (acetone-*d*<sub>6</sub>, 400 MHz) spectrum of compound 1

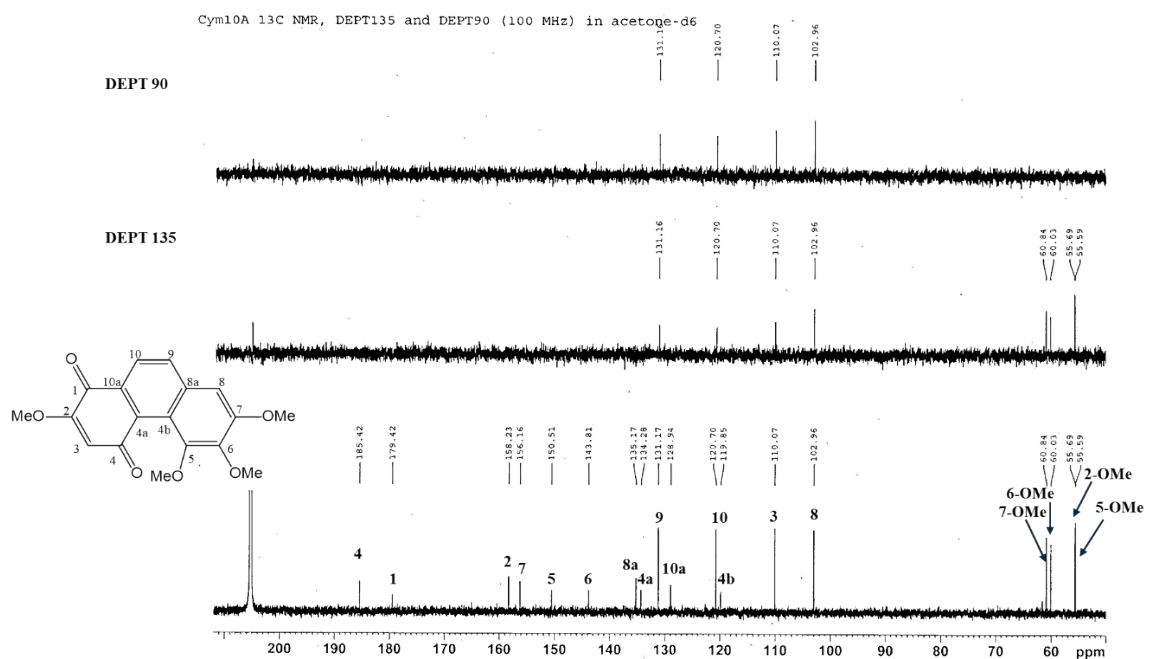

Figure S5.  $^{13}\text{C}$  NMR and DEPT (acetone- $d_6$ , 100 MHz) spectra of compound 1

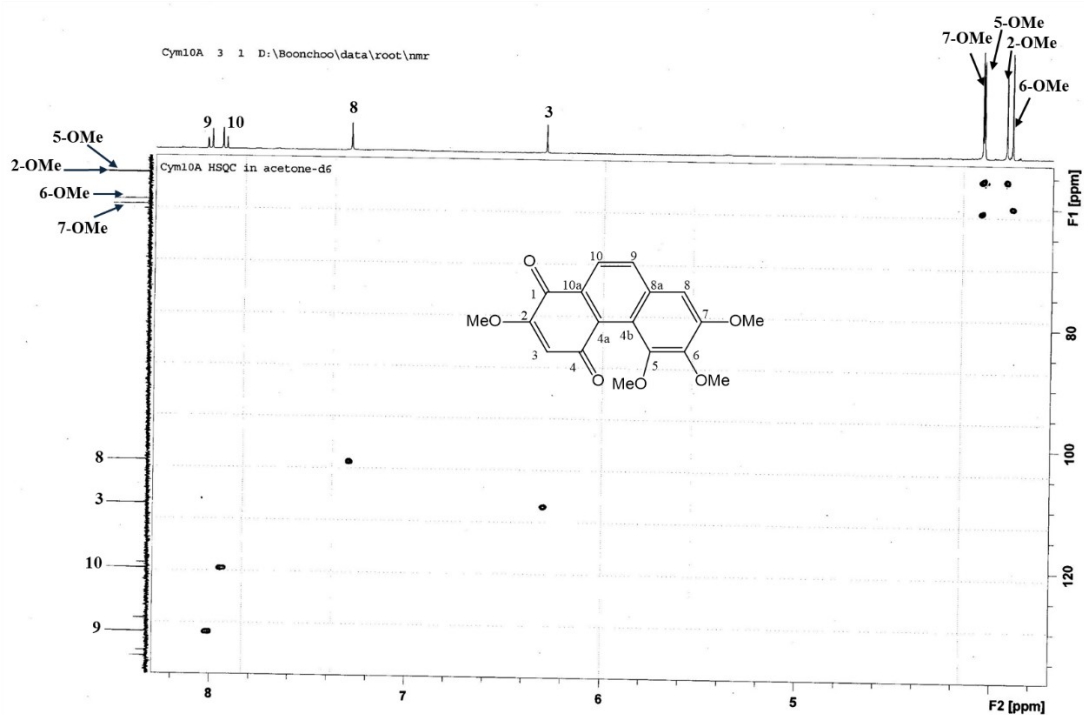

Figure S6. HSQC (acetone- $d_6$ , 400/100 MHz) spectrum of compound 1

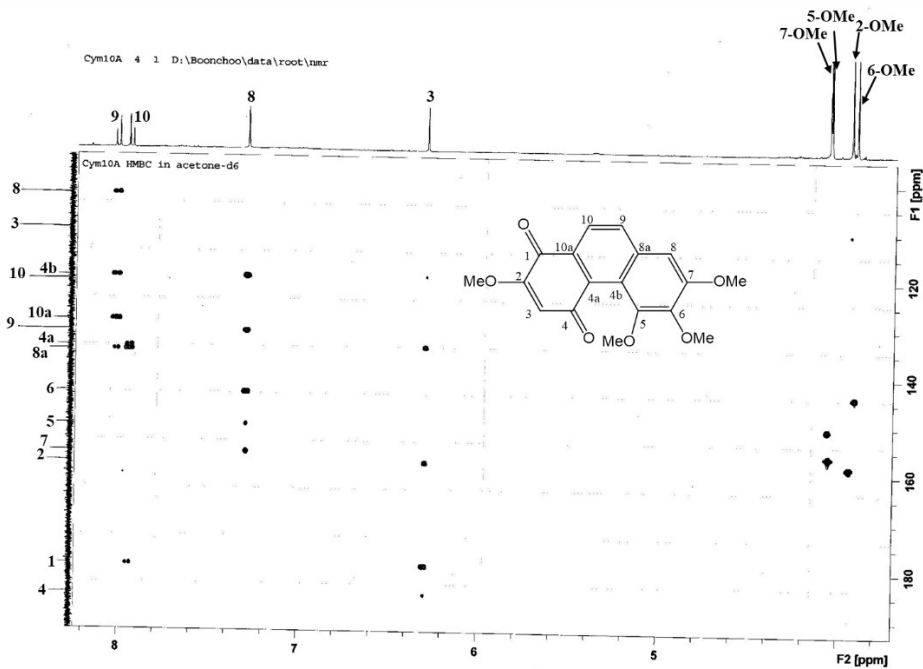

Figure S7. HMBC (acetone- $d_6$ , 400/100 MHz) spectrum of compound 1

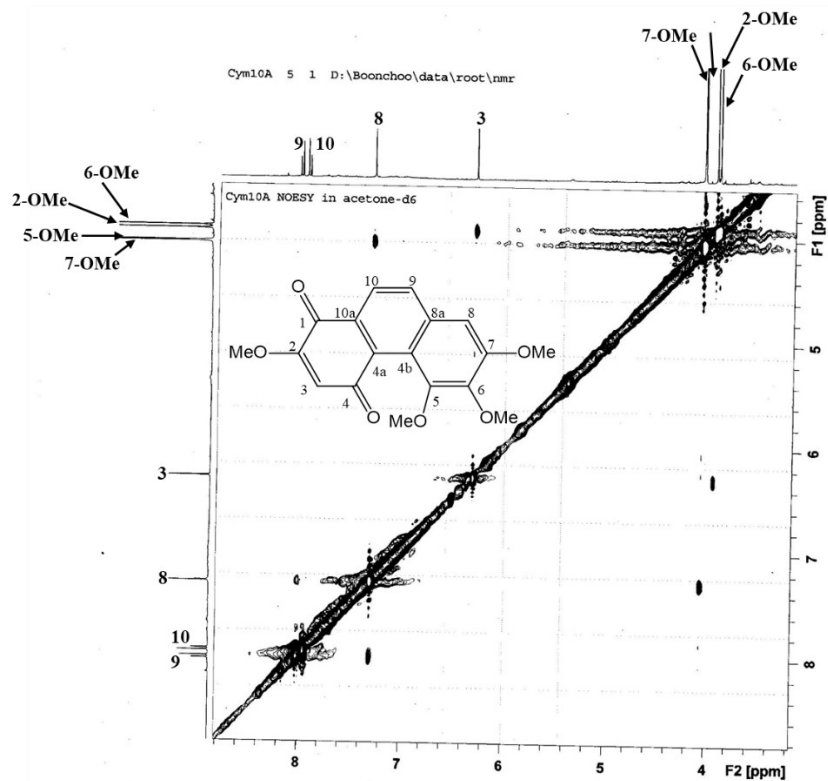

Figure S8. NOESY (acetone- $d_6$ , 400 MHz) spectrum of compound 1

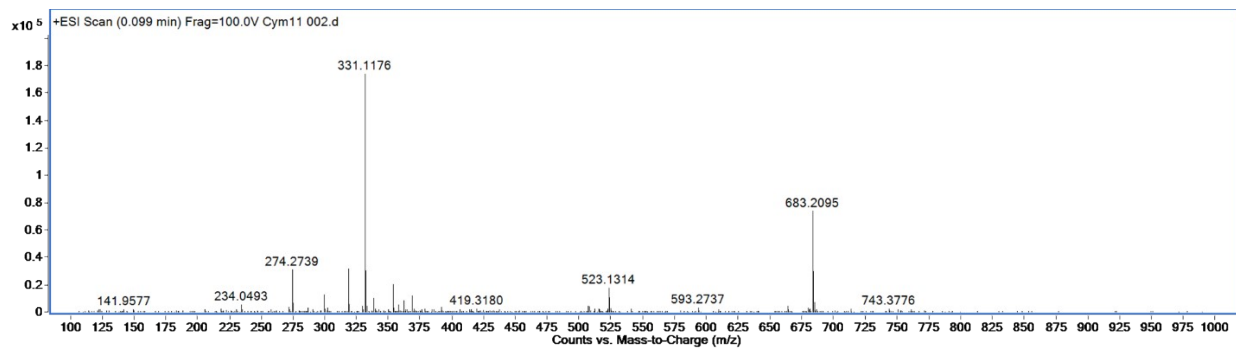

**Figure S9.** HR-ESI-MS spectrum of compound 2

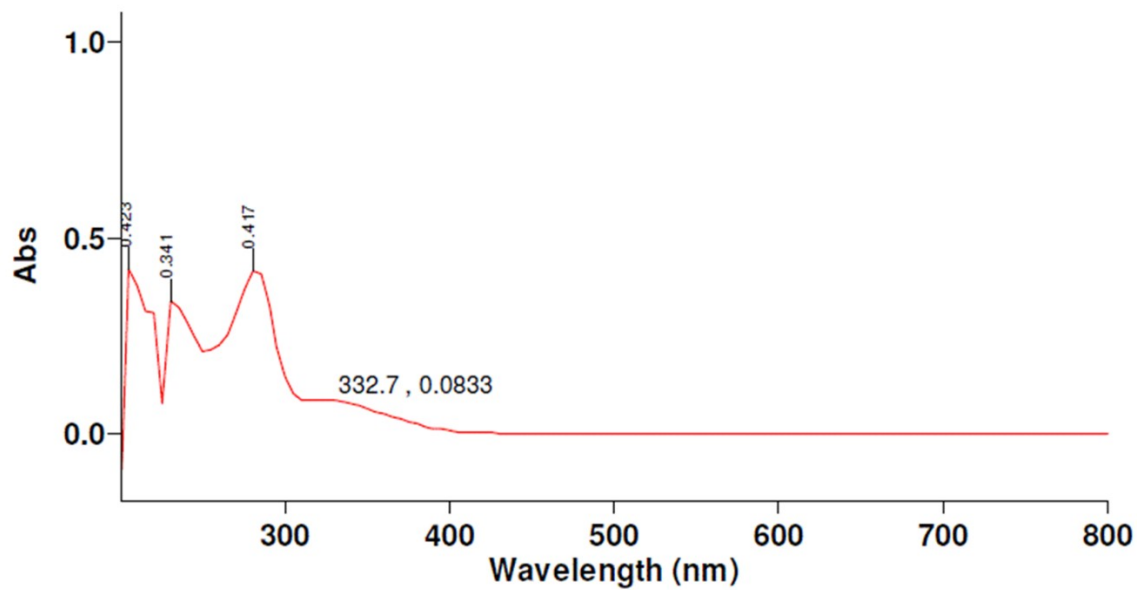

**Figure S10.** UV spectrum of compound 2 (0.05 mg in 3ml of MeOH)



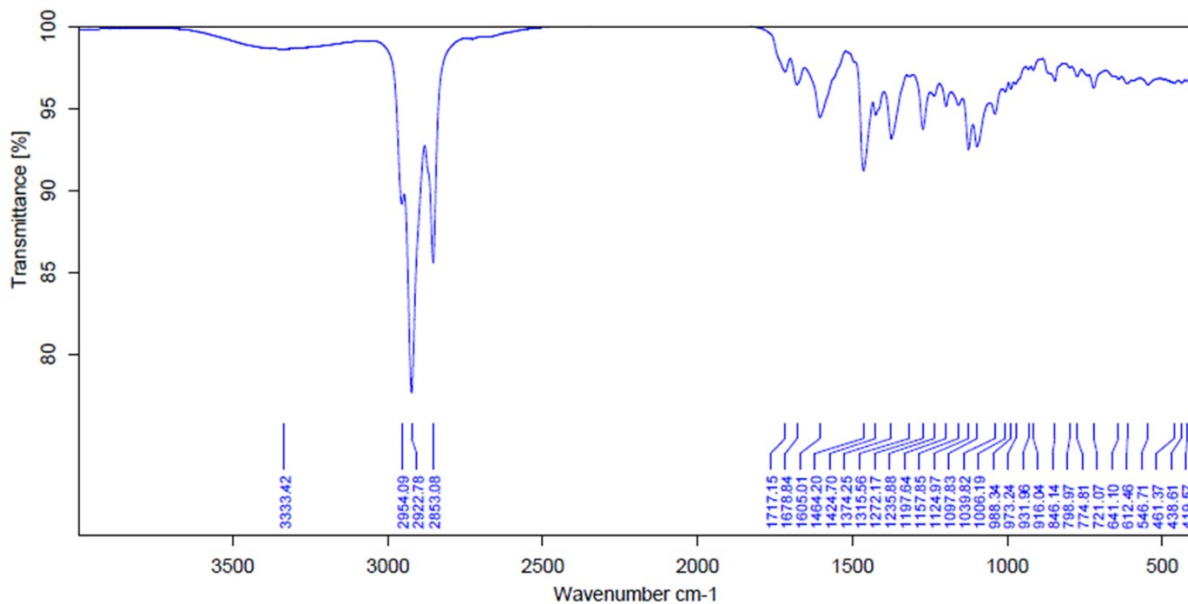

**Figure S11.** FT-IR spectrum of compound **2**

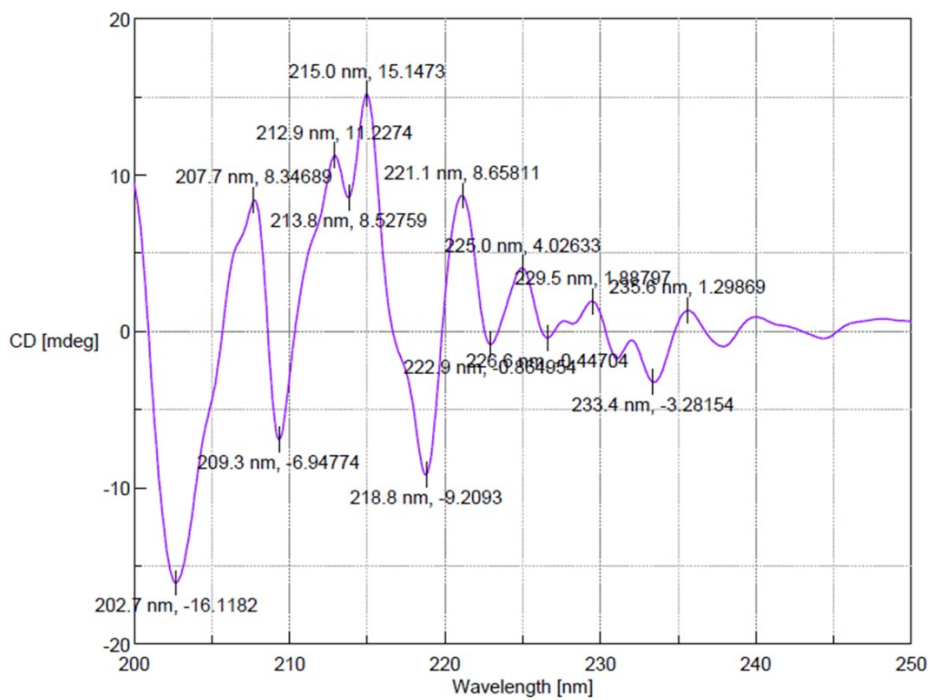

**Figure S12.** CD spectrum of compound **2** (0.1 mg in 3ml of MeOH)

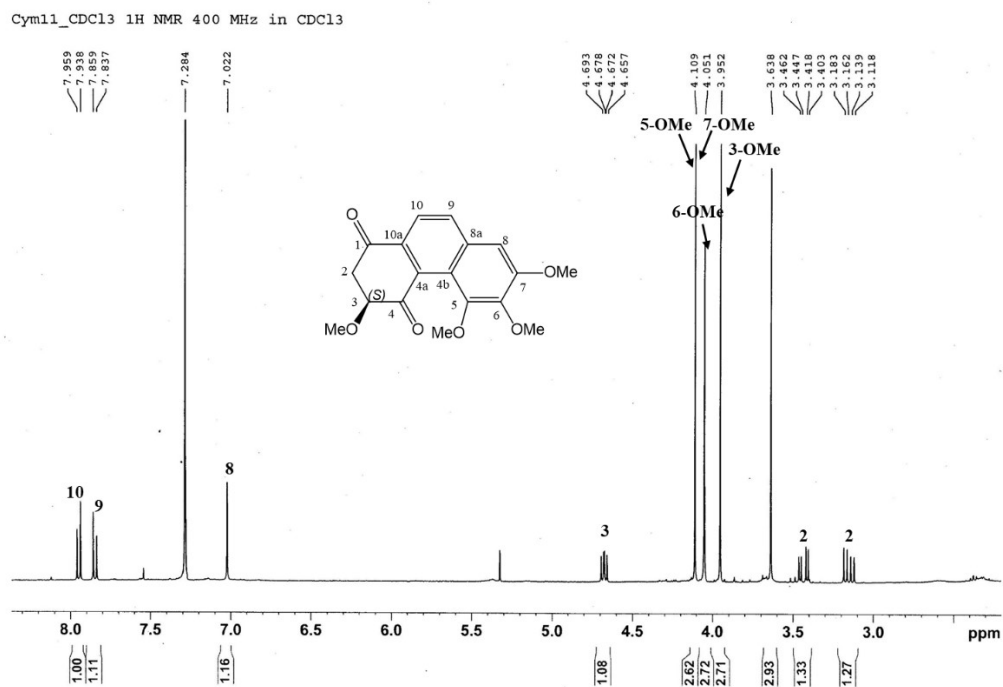

**Figure S13.**  $^1\text{H}$  NMR ( $\text{CDCl}_3$ , 400 MHz) spectrum of compound 2

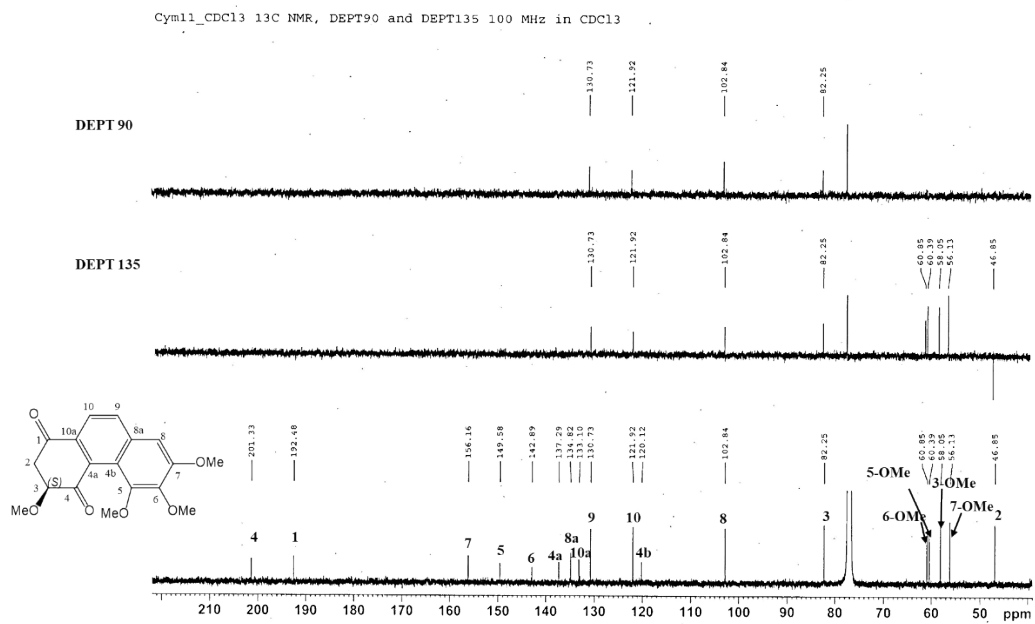

**Figure S14.**  $^{13}\text{C}$  NMR and DEPT ( $\text{CDCl}_3$ , 100 MHz) spectra of compound 2

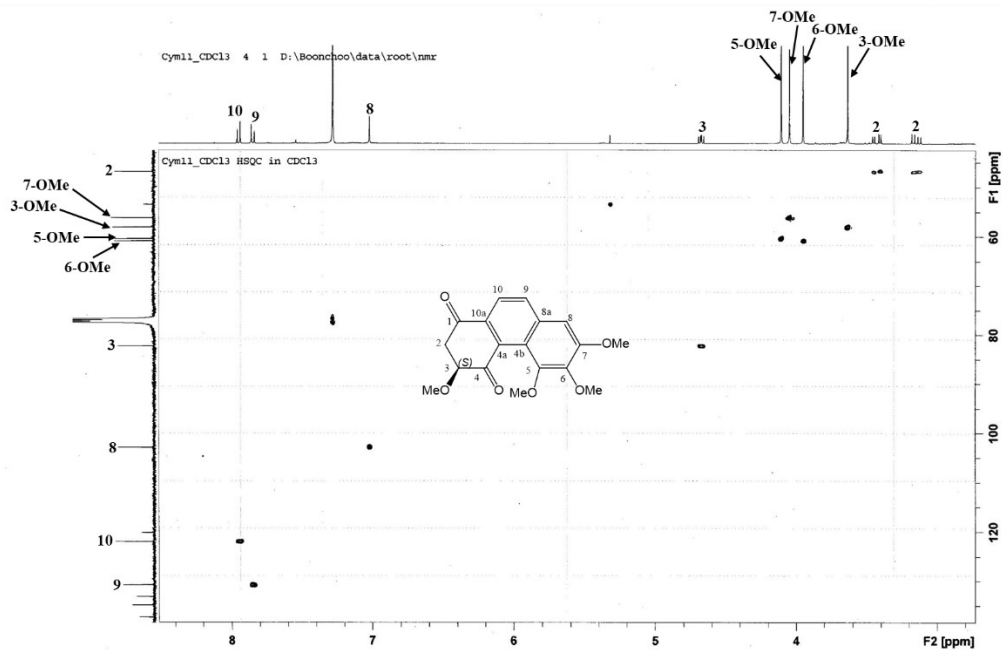

Figure S15. HSQC (CDCl<sub>3</sub>, 400/100 MHz) spectrum of compound 2

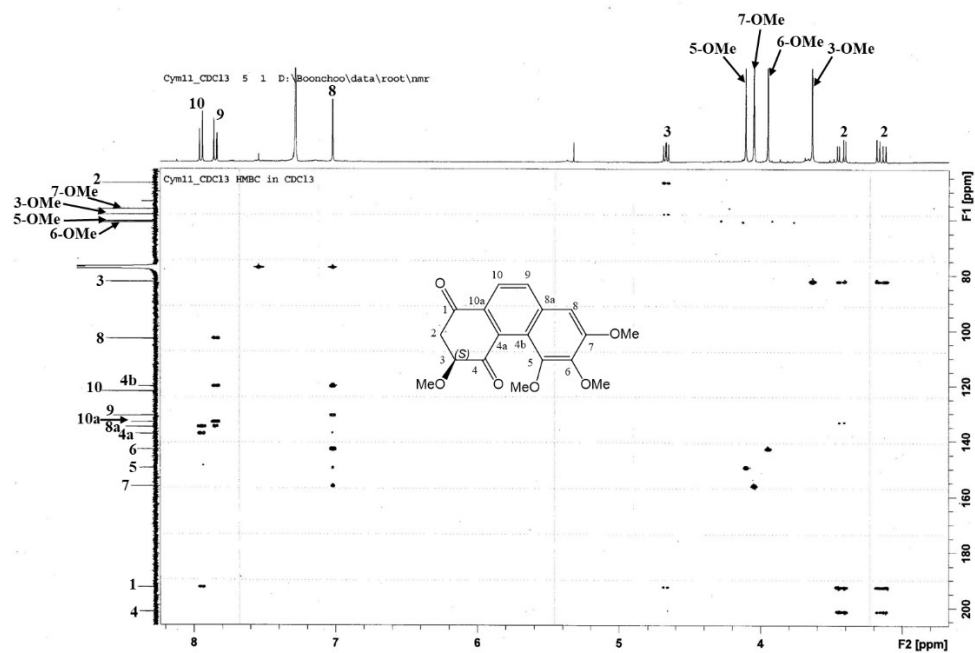

Figure S16. HMBC (CDCl<sub>3</sub>, 400/100 MHz) spectrum of compound 2



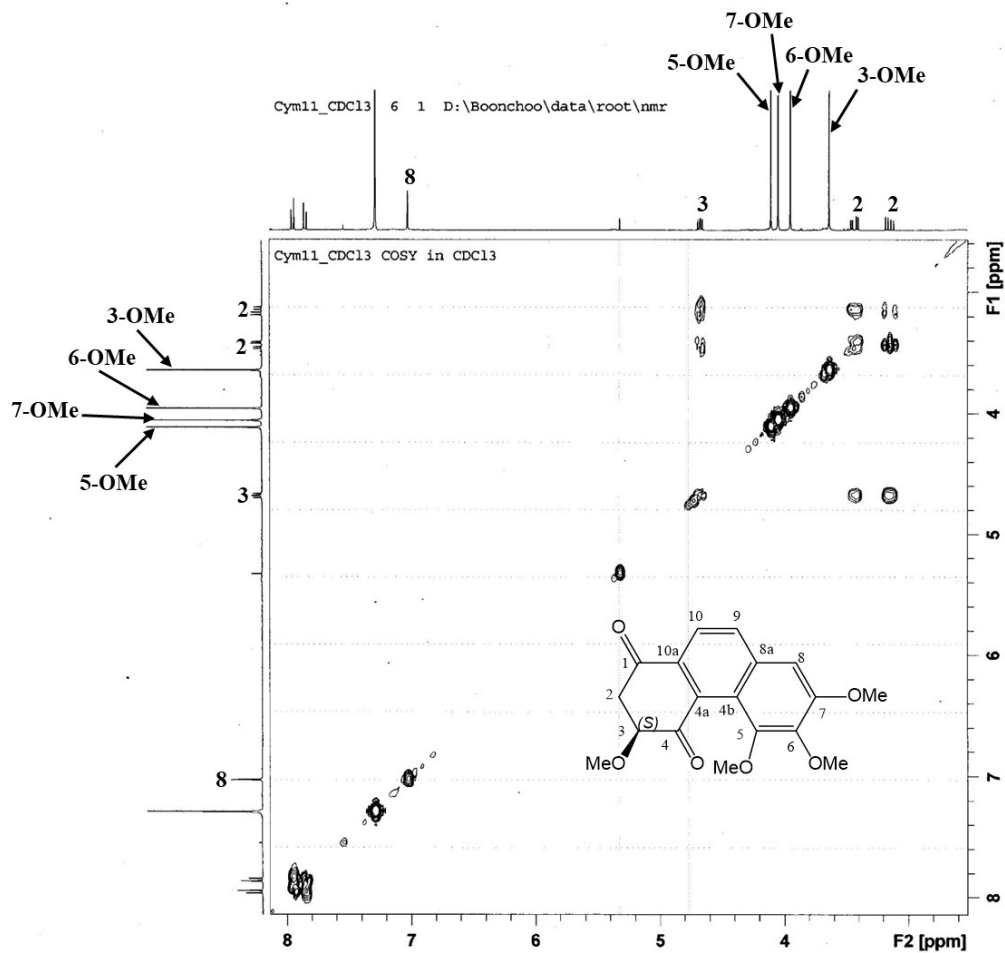

Figure S19. COSY (CDCl<sub>3</sub>, 400 MHz) spectrum of compound 2

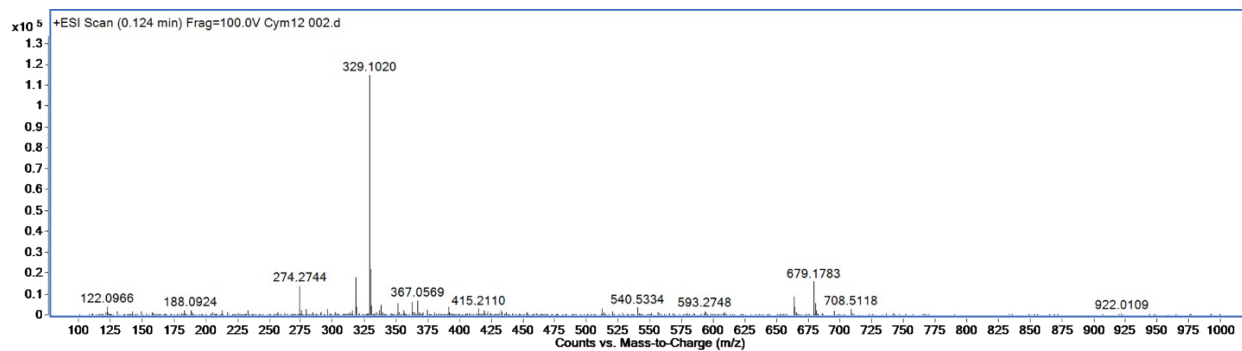

Figure S20. HR-ESI-MS spectrum of compound 3

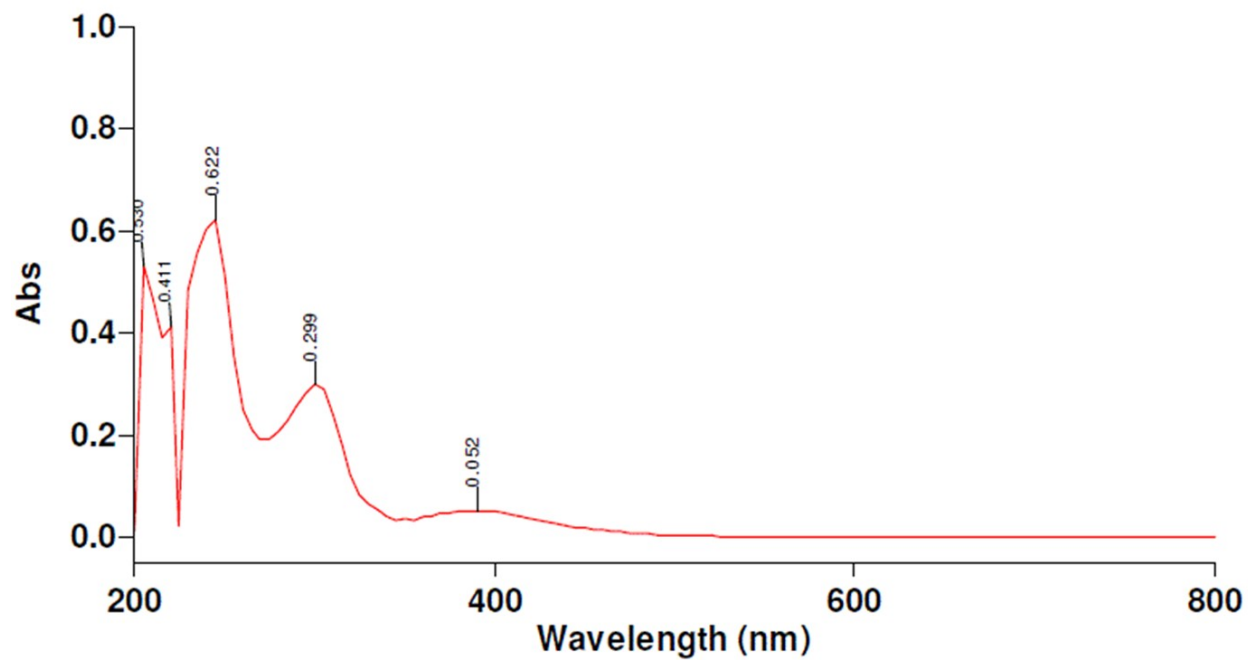

**Figure S21.** UV spectrum of compound **3** (0.05 mg in 3ml of MeOH)

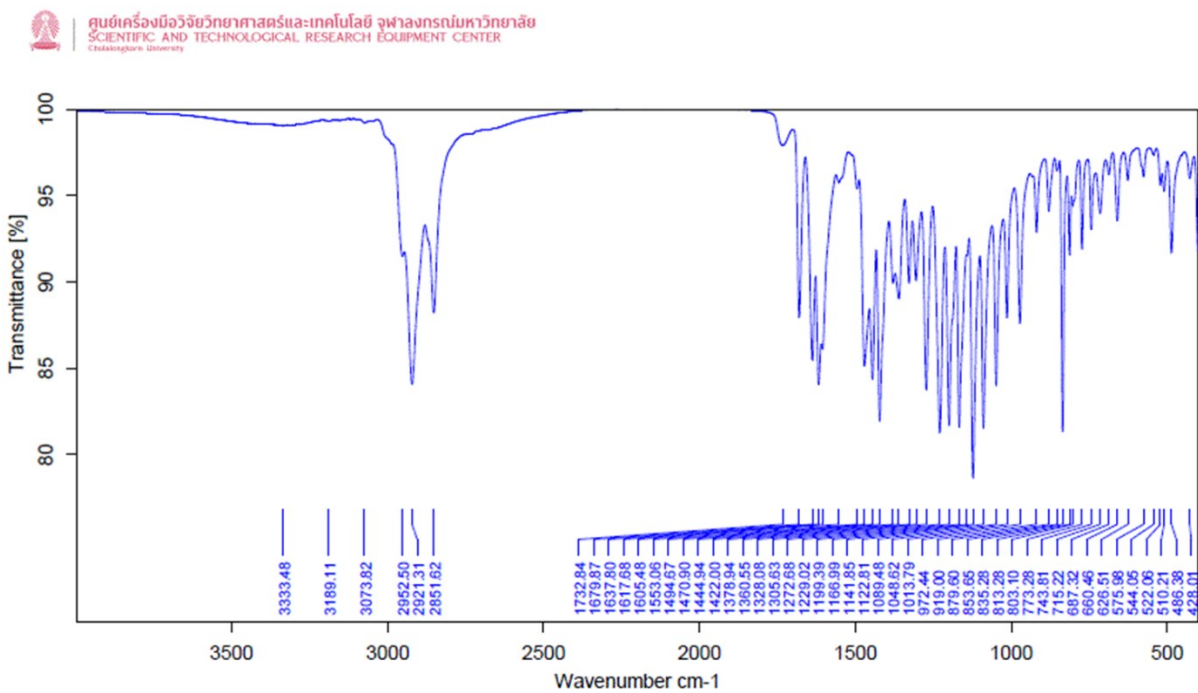

**Figure S22.** FT-IR spectrum of compound **3**



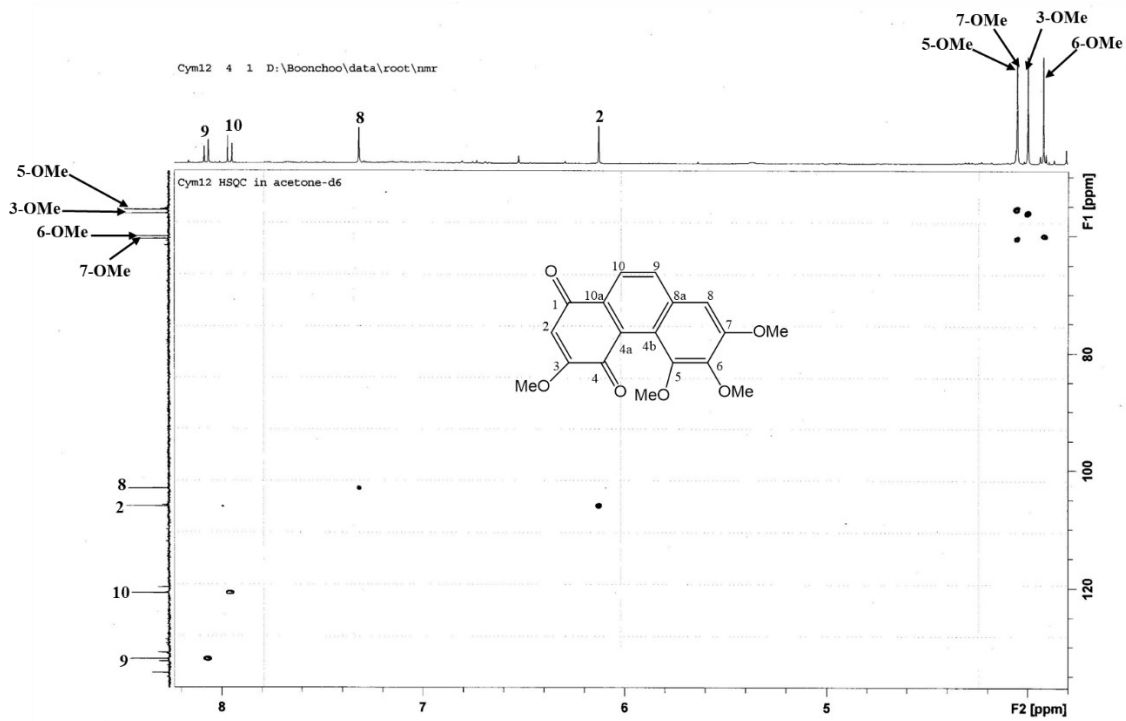

Figure S25. HSQC (acetone- $d_6$ , 400/100 MHz) spectrum of compound 3

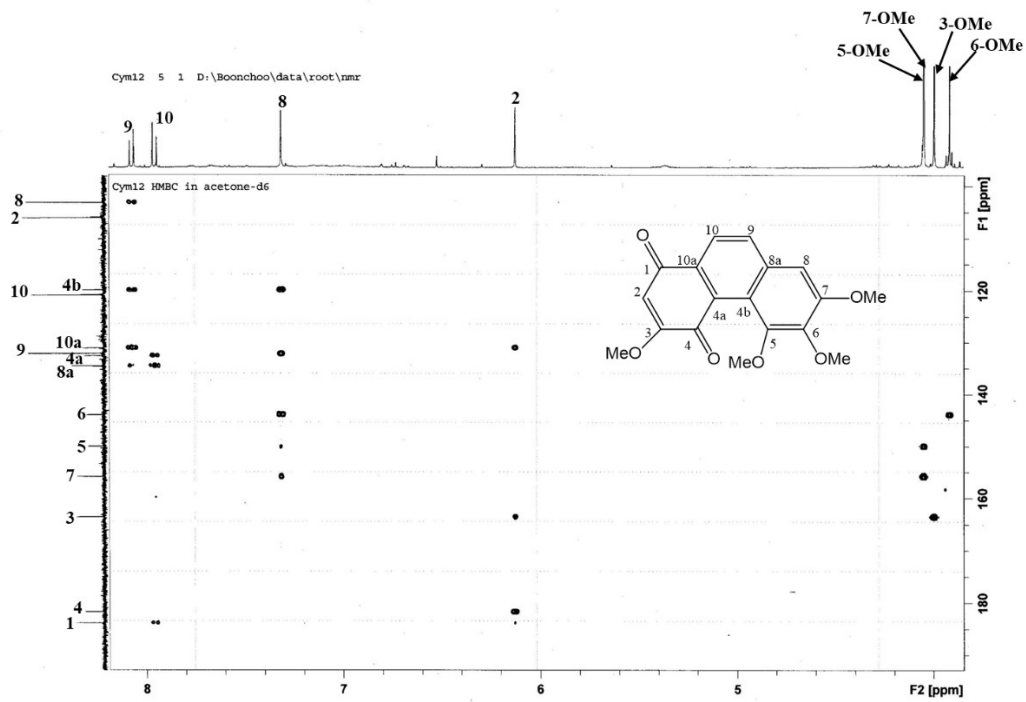

Figure S26. HMBC (acetone- $d_6$ , 400/100 MHz) spectrum of compound 3





P-p65-NF-kB (N1)

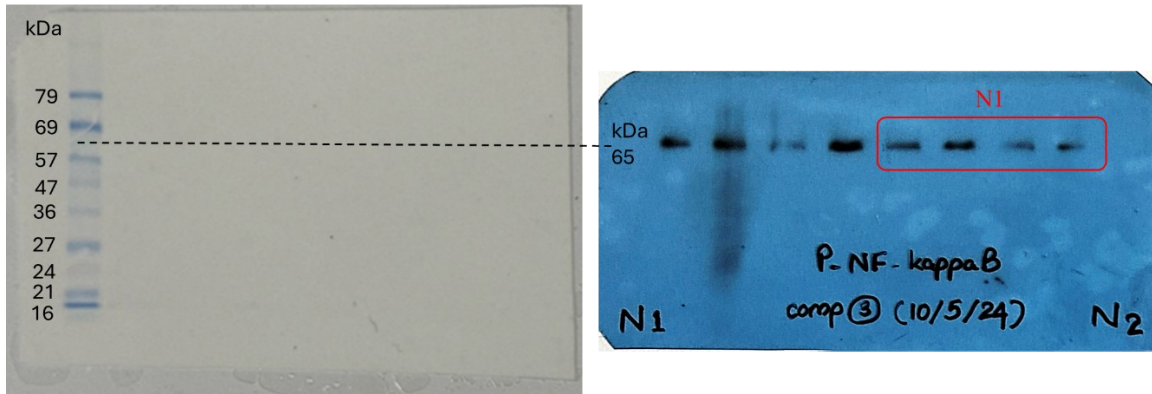

P65-NF-kB (N1)

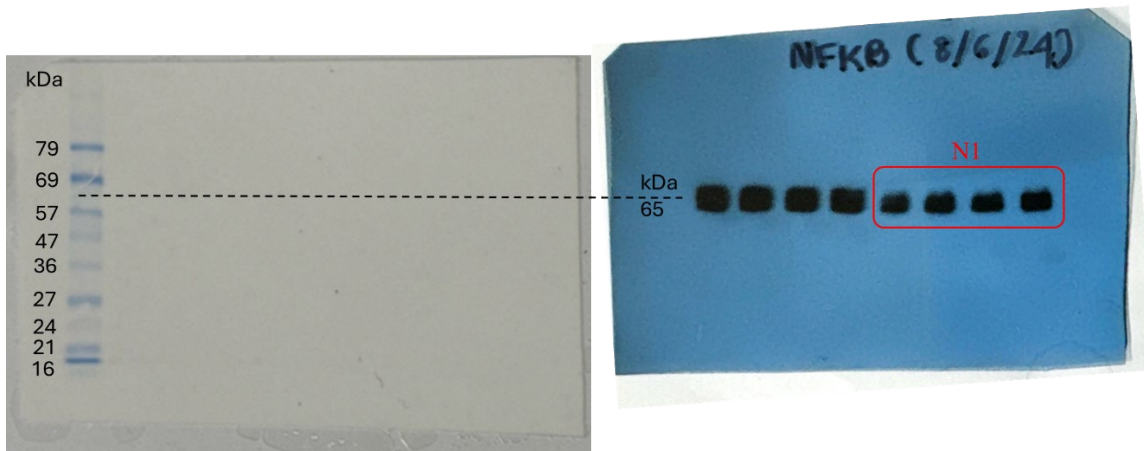

Beta-actin (rabbit) (N1)

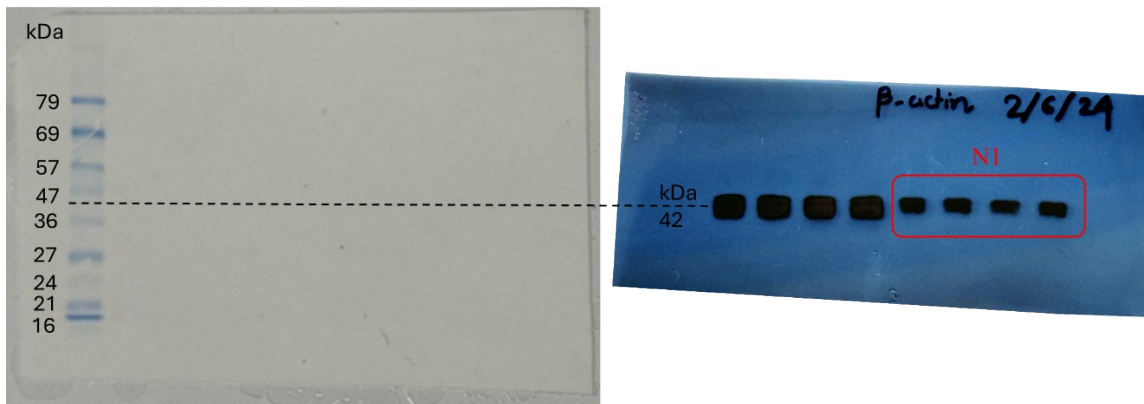

**Figure S29.** The whole western blots of N1 (P-NFκB, NFκB and β-actin)

P-p65-NF-kB (N2)

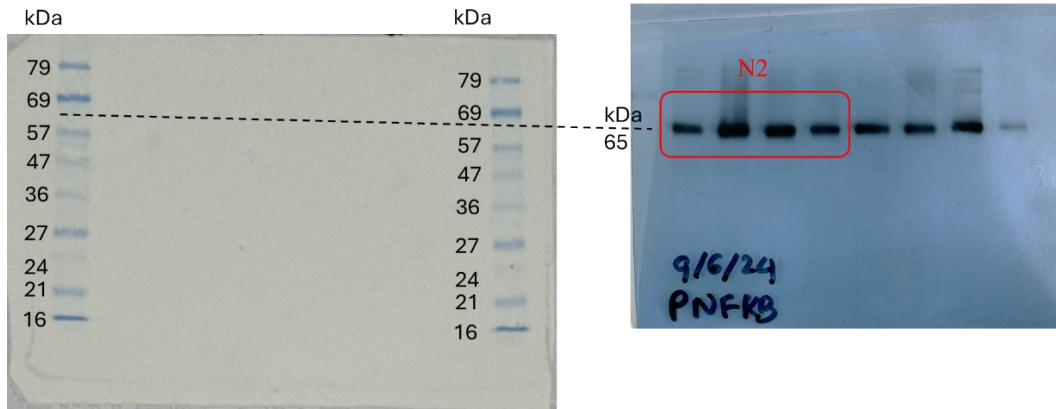

p65-NF-kB (N2)

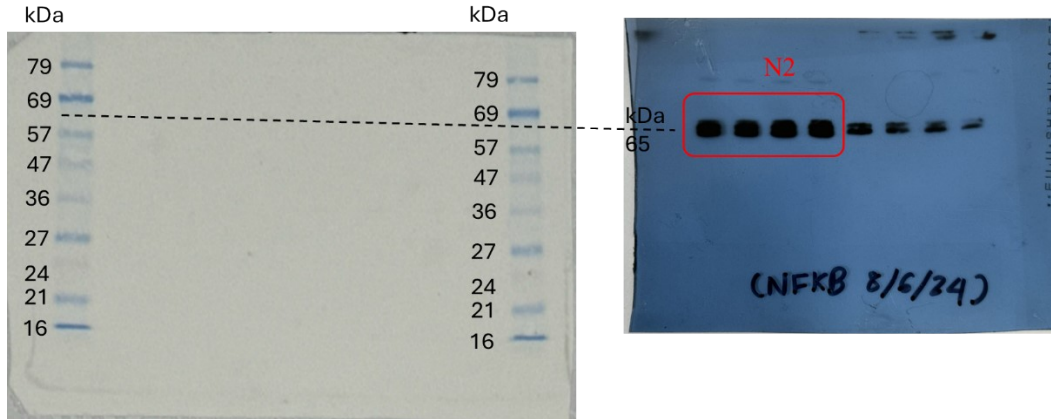

Beta-actin (rabbit) (N2)

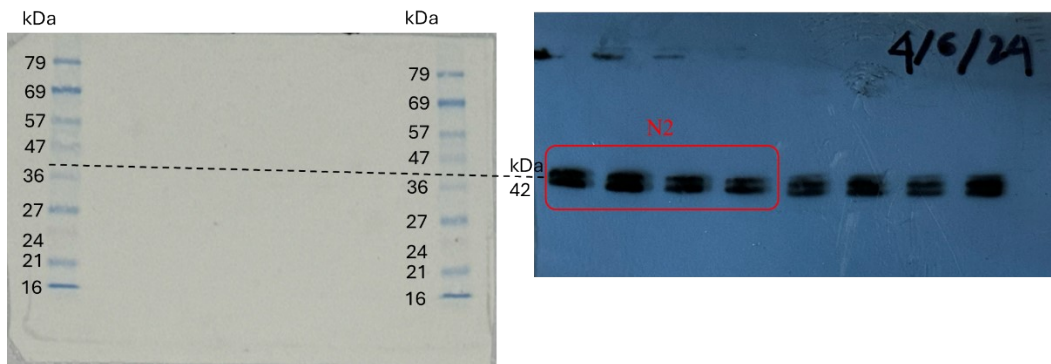

**Figure S30.** The whole western blots of N2 (P-NFkB, NFkB and  $\beta$ -actin)

P-p65-NF-kB (N3)

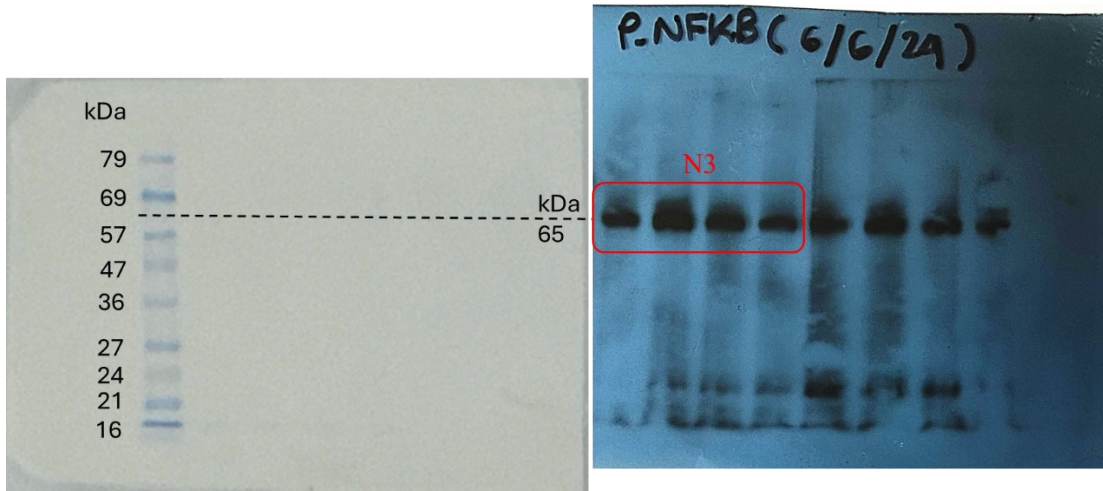

p65-NF-kB (N3)

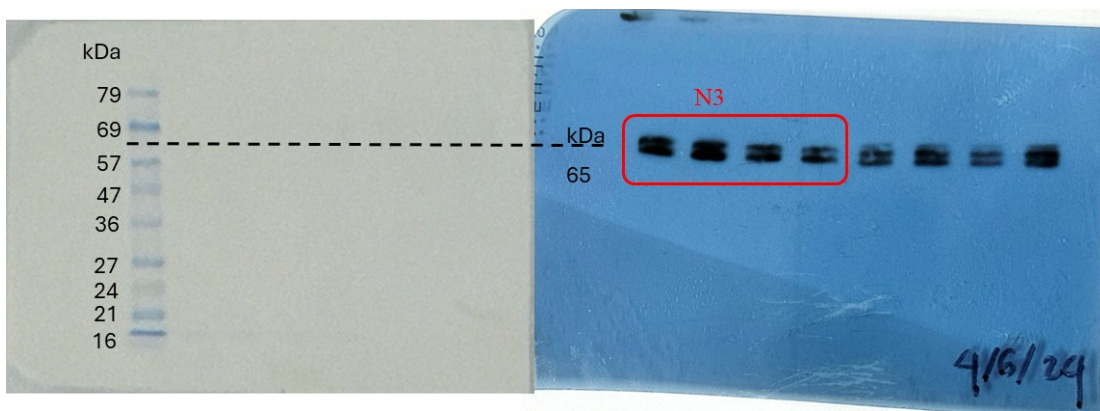

Beta-actin (rabbit) (N3)

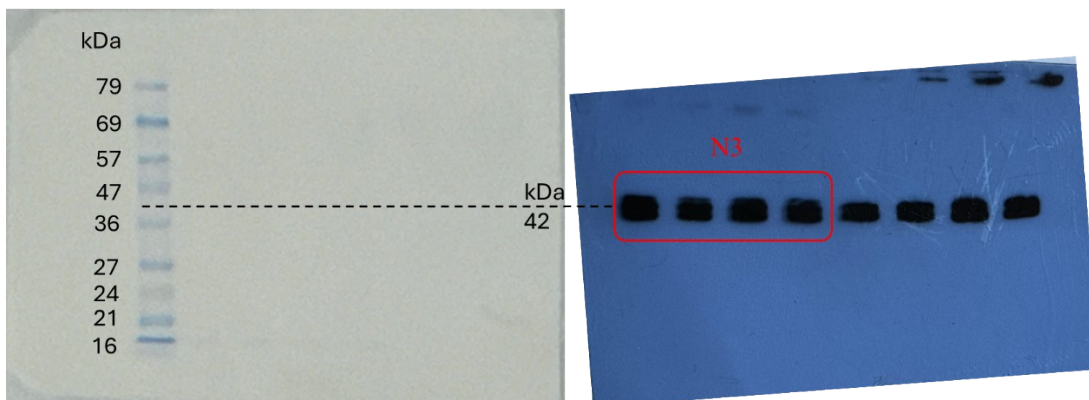

**Figure S31.** The whole western blots of N3 (P-NFκB, NFκB and β-actin)
